# Supplementary material
Source: ML conference proceedings conference paper supplement (https://proceedings.neurips.cc/paper_files/paper/2015/hash/e515df0d202ae52fcebb14295743063b-Abstract.html)
Supplement: Supplementary file [file e515df0d202ae52fcebb14295743063b-Supplemental.zip]

## Appendix

### A Proof of Theorem 1

This theorem can be understood as the extension of Proposition 2 in [9]. We follow the proof policy of that paper: Define  $Q(\mathbf{y}|x)$  as

$$Q(\mathbf{y}|x) := \log(P(\mathbf{y}|x)/P(\mathbf{0}|x)),$$

for any  $\mathbf{y} = (y_1, \dots, y_p) \in \mathcal{Y}^p$  given  $x$  where  $\mathbf{0}$  indicates a zero vector (The number of zeros vary appropriately in the context below). For any  $\mathbf{y}$ , also denote  $\bar{\mathbf{y}}_s := (y_1, \dots, y_{s-1}, 0, y_{s+1}, \dots, y_p)$ .

Now, consider the following general form for  $Q(\mathbf{y}|x)$ :

$$Q(\mathbf{y}|x) = \sum_{t_1 \in V} y_{t_1} G_{t_1}(y_{t_1}, x) + \dots + \sum_{t_1, \dots, t_k \in V} y_{t_1} \dots y_{t_k} G_{t_1, \dots, t_k}(y_{t_1}, \dots, y_{t_k}, x), \quad (12)$$

since the joint distribution on  $Y$  given  $X$  has factors of size  $k$  at most. It can then be seen that

$$\begin{aligned} \exp(Q(\mathbf{y}|x) - Q(\bar{\mathbf{y}}_s|x)) &= P(\mathbf{y}|x)/P(\bar{\mathbf{y}}_s|x) \\ &= \frac{P(y_s|y_1, \dots, y_{s-1}, y_{s+1}, \dots, y_p, x)}{P(0|y_1, \dots, y_{s-1}, y_{s+1}, \dots, y_p, x)}, \end{aligned} \quad (13)$$

where the first equality follows from the definition of  $Q$ , and the second equality follows from some algebra. Now, consider simplifications of both sides of (13). Given the form of  $Q(\mathbf{y}|x)$  in (12), we have

$$\begin{aligned} Q(\mathbf{y}|x) - Q(\bar{\mathbf{y}}_1|x) &= \\ y_1 \left( G_1(y_1, x) + \sum_{t=2}^p y_t G_{1t}(y_1, y_t, x) + \dots + \sum_{t_2, \dots, t_k \in \{2, \dots, p\}} y_{t_2} \dots y_{t_k} G_{1, t_2, \dots, t_k}(y_1, \dots, y_{t_k}, x) \right). \end{aligned} \quad (14)$$

Also, given the exponential family form of the node-conditional distribution specified in the theorem,

$$\begin{aligned} \log \frac{P(y_i|y_1, \dots, y_{s-1}, y_{s+1}, \dots, y_p, x)}{P(0|y_1, \dots, y_{s-1}, y_{s+1}, \dots, y_p, x)} &= \\ E_s(y_{V \setminus s}, x)(B_s(y_s) - B_s(0)) + (C_s(y_s) - C_s(0)). \end{aligned} \quad (15)$$

Setting  $y_t = 0$  for all  $t \neq s$  in (13), and using the expressions for the left and right hand sides in (14) and (15), we obtain,

$$\begin{aligned} &y_s G_s(y_s, x) \\ &= E_s(\mathbf{0}, x)(B_s(y_s) - B_s(0)) + (C_s(y_s) - C_s(0)). \end{aligned}$$

Setting  $y_r = 0$  for all  $r \notin \{s, t\}$ ,

$$\begin{aligned} &y_s G_s(y_s, x) + y_s y_t G_{st}(y_s, y_t, x) \\ &= E_s(\mathbf{0}, y_t, \mathbf{0}, x)(B_s(y_s) - B_s(0)) + (C_s(y_s) - C_s(0)). \end{aligned}$$

Combining these two equations yields

$$\begin{aligned} &y_s y_t G_{st}(y_s, y_t, x) \\ &= (E_s(\mathbf{0}, y_t, \mathbf{0}, x) - E_s(\mathbf{0}, x))(B_s(y_s) - B_s(0)). \end{aligned} \quad (16)$$

Similarly, from the same reasoning for node  $t$ , we have

$$\begin{aligned} &y_t G_t(y_t, x) + y_s y_t G_{st}(y_s, y_t, x) \\ &= E_t(\mathbf{0}, y_s, \mathbf{0}, x)(B_t(y_t) - B_t(0)) + (C_t(y_t) - C_t(0)), \end{aligned}$$

and at the same time,

$$\begin{aligned} & y_s y_t G_{st}(y_s, y_t, x) \\ &= (E_t(\mathbf{0}, y_s, \mathbf{0}, x) - E_t(\mathbf{0}, x))(B_t(y_t) - B_t(0)). \end{aligned} \quad (17)$$

Therefore, from (16) and (17), we obtain

$$\begin{aligned} & E_t(\mathbf{0}, y_s, \mathbf{0}, x) - E_t(\mathbf{0}, x) \\ &= \frac{E_s(\mathbf{0}, y_t, \mathbf{0}, x) - E_s(\mathbf{0}, x)}{B_t(y_t) - B_t(0)}(B_s(y_s) - B_s(0)). \end{aligned} \quad (18)$$

Since (18) should hold for all possible combinations of  $y_s, y_t$  and  $x$ , for any fixed  $y_t \neq 0$ ,

$$\begin{aligned} & E_t(\mathbf{0}, y_s, \mathbf{0}, x) - E_t(\mathbf{0}, x) \\ &= \theta_{st}(x)(B_s(y_s) - B_s(0)) \end{aligned} \quad (19)$$

where  $\theta_{st}(\cdot)$  is a function on  $x$ . Plugging (19) back into (17),

$$\begin{aligned} & y_s y_t G_{st}(y_s, y_t, x) \\ &= \theta_{st}(x)(B_s(y_s) - B_s(0))(B_t(y_t) - B_t(0)). \end{aligned}$$

More generally, by considering non-zero triplets, and setting  $y_r = 0$  for all  $r \notin \{s, t, u\}$ , we obtain,

$$\begin{aligned} & y_s G_s(y_s, x) + y_s y_t G_{st}(y_s, y_t, x) \\ &+ y_s y_u G_{su}(y_s, y_u, x) + y_s y_t y_u G_{stu}(y_s, y_t, y_u, x) \\ &= E_s(\mathbf{0}, y_t, \mathbf{0}, y_u, \mathbf{0}, x)(B_s(y_s) - B_s(0)) \\ &+ (C_s(y_s) - C_s(0)), \end{aligned}$$

so that by a similar reasoning we can obtain

$$\begin{aligned} & y_s y_t y_u G_{stu}(y_s, y_t, y_u, x) = \\ & \theta_{stu}(x)(B_s(y_s) - B_s(0))(B_t(y_t) - B_t(0))(B_u(y_u) - B_u(0)). \end{aligned}$$

More generally, we can show that

$$\begin{aligned} & y_{t_1} \dots y_{t_k} G_{t_1, \dots, t_k}(y_{t_1}, \dots, y_{t_k}, x) = \\ & \theta_{t_1, \dots, t_k}(x)(B_{t_1}(y_{t_1}) - B_{t_1}(0)) \dots (B_{t_k}(y_{t_k}) - B_{t_k}(0)). \end{aligned}$$

Thus, the  $k$ -th order factors in the joint distribution as specified in (12) are tensor products of  $(B_s(y_s) - B_s(0))$ , thus proving the statement of the theorem.

## B Proof of Theorem 3

### B.1 Conditions

A key quantity in the analysis is the Fisher Information matrix,  $Q^* = \nabla^2 \ell(\theta^*; \mathcal{Z})$ , the Hessian of the node-conditional log-likelihood where the reference node  $s$  should be understood implicitly. We use  $S = \{(s, t) : t \in N(s)\}$  to denote the true neighborhood of node  $s$ , and  $S^c$  to denote its complement. Similarly, we also use  $T$  to denote non-zero element of  $\theta^x$ , and  $T^c$  for its complement.  $Q_{SS}^*$  indicates  $d_y \times d_y$  sub-matrix indexed by  $S$  where  $d_y$  is the maximum node degree.  $Q_{TT}^*$  can be defined in a similar way, and so on. Our conditions mirror those in [10]:

**Condition 1** (Dependency condition). There exists a constant  $\rho_{\min} > 0$  such that  $\min\{\lambda_{\min}(Q_{SS}^*), \lambda_{\min}(Q_{TT}^*)\} \geq \rho_{\min}$  so that the sub-matrix of Fisher Information matrix corresponding to true neighborhood has bounded eigenvalues. Moreover, there exists a constant  $\rho_{\max} < \infty$  such that  $\lambda_{\max}(\mathbb{E}[\mathbb{I}[Y_{V \setminus s}; X][Y_{\setminus s}; X]^T]) \leq \rho_{\max}$ .

These condition can be understood as ensuring that variables do not become overly dependent. We will also need an incoherence or irrepresentable condition on the Fisher information matrix as in [13].

**Condition 2** (Incoherence condition). There exists a constant  $\alpha > 0$ , such that  $\max\{\max_{t \in S^c} \|Q_{tS}^*(Q_{SS}^*)^{-1}\|_1, \max_{v \in T^c} \|Q_{vT}^*(Q_{TT}^*)^{-1}\|_1\} \leq 1 - \alpha$ .

This condition, standard in high-dimensional analyses, can be understood as ensuring that irrelevant variables do not exert an overly strong effect on the true neighboring variables.

For notational simplicity, let  $Y'$  be the random vector including all random variables  $Y$  as well as covariates  $X$ , and  $G'' = (V'', E'')$  be the graph corresponding to the combined variables  $X$  and  $Y$ . By Theorem 1 and the node-conditional distributions specified in (10), the joint distribution  $P(X, Y)$  and the node-conditional distributions should have the form:

$$P(Y'; \theta) = \exp \left\{ \sum_{s \in V''} \theta_s B_s(Y'_s) + \sum_{(s,t) \in E''} \theta_{st} B_s(Y'_s) B_t(Y'_t) + \sum_{s \in V''} C_s(Y'_s) - A(\theta) \right\}, \quad (20)$$

$$P(Y'_s | Y'_{V'' \setminus s}; \theta) = \exp \left\{ B_s(Y'_s) \cdot \eta + C_s(Y'_s) - D_s(\eta) \right\} \quad (21)$$

where  $\eta = \theta_s + \sum_{t \in V'' \setminus s} \theta_{st} B_t(Y'_t)$ .

The following two conditions are on the log-partitions of (20) and (21):

**Condition 3.** The log-partition function  $A(\cdot)$  of the joint distribution of  $P(X, Y)$  (20) satisfies: For all  $s \in V \cup V'$ , (i) there exist constants  $\kappa_m, \kappa_v$  such that the first and the second moment satisfy  $\mathbb{E}[Y'_s] \leq \kappa_m$  and  $\mathbb{E}[Y'^2_s] \leq \kappa_v$ , respectively. Additionally, we have a constant  $\kappa_h$  for which  $\max_{u: |u| \leq 1} \frac{\partial^2 A(\theta)}{\partial \theta_s^2}(\{\theta_s^* + u, \theta^*\}) \leq \kappa_h$ , and (ii) for scalar variable  $\eta$ , we define a function which is slightly different from (5):

$$\bar{A}_s(\eta; \theta) := \log \int_{\mathcal{Y}^p} \exp \left\{ \eta B_s(Y'_s)^2 + \sum_{s \in V''} \theta_s B_s(Y'_s) + \sum_{(s,t) \in E''} \theta_{st} B_s(Y'_s) B_t(Y'_t) + \sum_{s \in V''} C_s(Y'_s) \right\}, \quad (22)$$

where  $\nu$  is an underlying measure with respect to which the density is taken. Then, there exists a constant  $\kappa_h$  such that  $\max_{u: |u| \leq 1} \frac{\partial^2 \bar{A}_s(\eta; \theta^*)}{\partial \eta^2}(u) \leq \kappa_h$ .

**Condition 4.** For all  $s \in V$ , the log-partition function  $D(\cdot)$  of the node-wise conditional distribution (21) satisfies: there exist functions  $\kappa_1(n, p)$  and  $\kappa_2(n, p)$  (that depend on the exponential family) such that, for all feasible pairs of  $\theta$  and  $X$ ,  $|D''(a)| \leq \kappa_1(n, p)$  where  $a \in [b, b + 4\kappa_2(n, p) \max\{\log n, \log p\}]$  for  $b := \theta_s + \langle \theta_{\setminus s}, X_{V'' \setminus s} \rangle$ . Additionally,  $|D'''(b)| \leq \kappa_3(n, p)$  for all feasible pairs of  $\theta$  and  $X$ . Note that  $\kappa_1(n, p), \kappa_2(n, p)$  and  $\kappa_3(n, p)$  are functions that might be dependent on  $n$  and  $p$ , which affect our main theorem below.

Conditions 3 and 4 are the key technical components enabling us to generalize the analyses in [11, 12, 13] to the general GLM case.

Armed with the conditions above, we can show that the random vectors  $Y$  given  $X$  following the conditional graphical model distribution in (10) are suitably well-behaved (the proof can be trivially extended from [10]):

**Proposition 1.** Suppose  $Y$  is a random vector with the distribution specified in (10). Further, we assume that the node-conditional distribution of  $X_u$  has the exponential family form (6). Then, for  $\delta \leq \min\{2\kappa_v/3, \kappa_h + \kappa_v\}$ , and some constant  $c > 0$ ,

$$P\left(\frac{1}{n} \sum_{i=1}^n B_s(Y_s^{(i)})^2 \geq \delta\right) \leq \exp(-cn\delta^2), \quad P\left(\frac{1}{n} \sum_{i=1}^n B_u(X_u^{(i)})^2 \geq \delta\right) \leq \exp(-cn\delta^2).$$

Furthermore, For any positive constant  $\delta$ , and some constant  $c > 0$ ,

$$P(|B_s(Y_s)| \geq \delta \log \eta) \leq c\eta^{-\delta}, \quad \text{and} \quad P(|B_u(X_u)| \geq \delta \log \eta) \leq c\eta^{-\delta}.$$

This proposition plays a key role in the proof of sparsistency result below.

## B.2 Proof of Theorem 3

Since two regularizers in the optimization problem (11) separately concern two distinct sets of parameters, the subgradient optimality condition from the convex objective can be written as

$$\nabla \ell(\hat{\boldsymbol{\theta}}; \mathcal{Z}) + \begin{bmatrix} 0 \\ \lambda_{x,n} \hat{Z}^x \\ \lambda_{y,n} \hat{Z}^y \end{bmatrix} = 0, \quad (23)$$

where  $\hat{Z}^x$  is a subgradient vector corresponding to the parameter  $\theta^x$ ; if  $\hat{\theta}_{si} \neq 0$ , then the corresponding element in  $\hat{Z}^x$  has  $\text{sign}(\hat{\theta}_{si})$ , and its absolute value is smaller than 1 otherwise.  $\hat{Z}^y$  is defined in a similar way. In the high-dimensional regime with  $p, q \gg n$ , the objective function is not necessarily strictly convex, as a result, it might be the case that there are multiple optimal solutions satisfying (23). Nonetheless, we can complete the proof simply by using the *primal-dual witness* techniques used in the several past works [13, 25]; We only need to show the strict dual feasibility holds with high probability, for the optimal parameters solving the optimization problem with the knowledge of *unknown* support set.

In order to show the dual feasibility holds, i.e.,  $\|\hat{Z}^x\|_\infty < 1$  and  $\|\hat{Z}^y\|_\infty < 1$  with high probability, we rewrite a subgradient condition (23) into a form easier to analyze:

$$\nabla^2 \ell(\boldsymbol{\theta}^*; \mathcal{Z})(\hat{\boldsymbol{\theta}} - \boldsymbol{\theta}^*) + \begin{bmatrix} 0 \\ \lambda_{x,n} \hat{Z}^x \\ \lambda_{y,n} \hat{Z}^y \end{bmatrix} = \begin{bmatrix} W_1^n \\ W_x^n \\ W_y^n \end{bmatrix} + \begin{bmatrix} R_1^n \\ R_x^n \\ R_y^n \end{bmatrix}, \quad (24)$$

where  $W^n$  represented as the vector form in the right-hand side is defined as  $-\nabla \ell(\hat{\boldsymbol{\theta}}; \mathcal{Z})$ , and similarly  $R^n$  is the remainder after the coordinate-wise application of the mean value theorems;  $R_j^n = [\nabla^2 \ell(\boldsymbol{\theta}^*; \mathcal{Z}) - \nabla^2 \ell(\bar{\boldsymbol{\theta}}^{(j)}; \mathcal{Z})]_j^T (\hat{\boldsymbol{\theta}} - \boldsymbol{\theta}^*)$ , for some  $\bar{\boldsymbol{\theta}}^{(j)}$  on the line between  $\hat{\boldsymbol{\theta}}$  and  $\boldsymbol{\theta}^*$ , and with  $[\cdot]_j^T$  being the  $j$ -th row of a matrix.

In the sequel, we provide three lemmas that control the right-hand side of (24):

**Lemma 1.** Suppose that we set  $\lambda_{x,n}$  and  $\lambda_{y,n}$  to satisfy:

$$\lambda_{x,n} \geq \frac{8(2-\alpha)}{\alpha} \sqrt{\kappa_1(n,p)\kappa_4} \sqrt{\frac{\log q}{n}}, \quad \lambda_{y,n} \geq \frac{8(2-\alpha)}{\alpha} \sqrt{\kappa_1(n,p)\kappa_4} \sqrt{\frac{\log p}{n}} \text{ and} \\ \max\{\lambda_{x,n}, \lambda_{y,n}\} \leq \frac{4(2-\alpha)}{\alpha} \kappa_1(n,p)\kappa_2(n,p)\kappa_4,$$

for some constant  $\kappa_4 \leq \min\{2\kappa_v/3, 2\kappa_h + \kappa_v\}$ . Suppose also that  $n \geq \frac{8\kappa_h^2}{\kappa_4}(\log p + \log q)$ . Then, given the mutual incoherence parameter  $\alpha \in (0, 1]$ , and  $p' := \max\{n, p + q\}$ ,

$$P\left(\frac{2-\alpha}{\lambda_{x,n}} \|W_x^n\|_\infty \leq \frac{\alpha}{4}, \frac{2-\alpha}{\lambda_{y,n}} \|W_y^n\|_\infty \leq \frac{\alpha}{4}\right) \geq 1 - c_1 p'^{-2} - \exp(-c_2 n) - \exp(-c_3 n). \quad (25)$$

**Lemma 2.** Suppose that  $\sqrt{d_x + d_y} \max\{\sqrt{d_x} \lambda_{x,n}, \sqrt{d_y} \lambda_{y,n}\} \leq \frac{\rho_{\min}^2}{72\rho_{\max}\kappa_3(n,p)\log p'}$  and  $\|W^n\|_\infty \leq \frac{\lambda_n}{4}$ . Then, we have

$$P\left(\|\hat{\boldsymbol{\theta}}_S - \boldsymbol{\theta}_S^*\|_2 + \|\hat{\boldsymbol{\theta}}_T - \boldsymbol{\theta}_T^*\|_2 \leq \frac{9}{\rho_{\min}} \max\{\sqrt{d_x} \lambda_{x,n}, \sqrt{d_y} \lambda_{y,n}\}\right) \geq 1 - c_1 p'^{-2},$$

for some constant  $c_1 > 0$ .

**Lemma 3.** If  $\frac{\max\{d_x \lambda_{x,n}^2, d_y \lambda_{y,n}^2\}}{\min\{\lambda_{x,n}, \lambda_{y,n}\}} \leq \frac{\rho_{\min}^2}{1296\rho_{\max}\kappa_3(n,p)\log p'} \frac{\alpha}{2-\alpha}$ ,  $\sqrt{d_x + d_y} \max\{\sqrt{d_x} \lambda_{x,n}, \sqrt{d_y} \lambda_{y,n}\} \leq \frac{\rho_{\min}^2}{40\rho_{\max}\kappa_3(n,p)\log p'}$ , and  $\|W^n\|_\infty \leq \frac{\lambda_n}{4}$ , then we have

$$P\left(\frac{\|R^n\|_\infty}{\min\{\lambda_{x,n}, \lambda_{y,n}\}} \leq \frac{\alpha}{4(2-\alpha)}\right) \geq 1 - c_1 p'^{-2},$$

for some constant  $c_1 > 0$ .

Armed with these lemmas, the proof of Theorem 3 is straightforward: Consider the choice of regularization parameters

$$\lambda_{x,n} = \frac{8(2-\alpha)}{\alpha} \sqrt{\kappa_1(n,p)\kappa_4} \sqrt{\frac{\log q}{n}}, \text{ and } \lambda_{y,n} = \frac{8(2-\alpha)}{\alpha} \sqrt{\kappa_1(n,p)\kappa_4} \sqrt{\frac{\log p}{n}}.$$

Then for  $n \geq \max \left\{ \frac{4}{\kappa_1(n,p)\kappa_2(n,p)^2\kappa_4}, \frac{16\kappa_h^2}{\kappa_4^2} \right\} \log p'$ , the conditions of Lemma 1 are satisfied, hence (25) holds with high probability. Moreover, given (25) holds, with a sufficiently large sample size  $n \geq L' \left( \frac{2-\alpha}{\alpha} \right)^4 (d_x + d_y)^2 \kappa_1(n,p) \kappa_3(n,p)^2 (\log p + \log q) (\log p')^2$  for some constant  $L' > 0$ , the conditions of Lemma 2 and 3 are also satisfied, and therefore, the resulting statements in Lemma 2 and 3 also hold with high probability.

*Strict dual feasibility.* By some algebra, we obtain

$$\begin{aligned} \lambda_{x,n} \hat{Z}_{T^c}^x &= Q_{T^c T}^* (Q_{TT}^*)^{-1} [-W_T^n + R_T^n - \lambda_{x,n} \hat{Z}_T^x] + W_{T^c}^n - R_{T^c}^n \\ \lambda_{y,n} \hat{Z}_{S^c}^y &= Q_{S^c S}^* (Q_{SS}^*)^{-1} [-W_S^n + R_S^n - \lambda_{y,n} \hat{Z}_S^y] + W_{S^c}^n - R_{S^c}^n. \end{aligned}$$

Therefore, by Hölder's inequality and the fact that  $\|\hat{Z}_S^y\|_\infty \leq 1$ ,

$$\begin{aligned} \|\hat{Z}_{S^c}^y\|_\infty &\leq \|Q_{S^c S}^* (Q_{SS}^*)^{-1}\|_\infty \left[ \frac{\|W_S^n\|_\infty}{\lambda_{y,n}} + \frac{\|R_S^n\|_\infty}{\lambda_{y,n}} + 1 \right] + \frac{\|W_{S^c}^n\|_\infty}{\lambda_{y,n}} + \frac{\|R_{S^c}^n\|_\infty}{\lambda_{y,n}} \\ &\leq (1-\alpha) + (2-\alpha) \left[ \frac{\|W_y^n\|_\infty}{\lambda_{y,n}} + \frac{\|R^n\|_\infty}{\lambda_{y,n}} \right] \\ &\leq (1-\alpha) + (2-\alpha) \left[ \frac{\|W_y^n\|_\infty}{\lambda_{y,n}} + \frac{\|R^n\|_\infty}{\min\{\lambda_{x,n}, \lambda_{y,n}\}} \right] \leq (1-\alpha) + \frac{\alpha}{4} + \frac{\alpha}{4} = 1 - \frac{\alpha}{2} < 1. \end{aligned}$$

Similarly, we have

$$\|\hat{Z}_{T^c}^x\|_\infty \leq (1-\alpha) + (2-\alpha) \left[ \frac{\|W_x^n\|_\infty}{\lambda_{x,n}} + \frac{\|R^n\|_\infty}{\min\{\lambda_{x,n}, \lambda_{y,n}\}} \right] \leq (1-\alpha) + \frac{\alpha}{4} + \frac{\alpha}{4} = 1 - \frac{\alpha}{2} < 1.$$

*Correct sign recovery.* To guarantee that the support of  $\hat{\theta}$  is not strictly within the true support  $S$ , it suffices to show that  $\max \{ \|\hat{\theta}_S - \theta_S^*\|_\infty, \|\hat{\theta}_T - \theta_T^*\|_\infty \} \leq \frac{\theta_{\min}^*}{2}$ . From Lemma 2, we have

$$\begin{aligned} \max \{ \|\hat{\theta}_S - \theta_S^*\|_\infty, \|\hat{\theta}_T - \theta_T^*\|_\infty \} &\leq \|\hat{\theta}_S - \theta_S^*\|_2 + \|\hat{\theta}_T - \theta_T^*\|_2 \\ &\leq \frac{5}{\rho_{\min}} \max \{ \sqrt{d_x} \lambda_{x,n}, \sqrt{d_y} \lambda_{y,n} \} \leq \frac{\theta_{\min}^*}{2} \end{aligned}$$

as long as  $\theta_{\min}^* \geq \frac{10}{\rho_{\min}} \max \{ \sqrt{d_x} \lambda_{x,n}, \sqrt{d_y} \lambda_{y,n} \}$ , which completes the proof.

### B.3 Proof of Lemma 1

For the proof, we first define two events that would be useful even in the proofs of the remaining lemmas:

$$\begin{aligned} \xi_1 &:= \left[ \max_{i,s,u} \{ |B_s(Y_s^{(i)})|, |B_u(X_u^{(i)})| \} \leq 4 \log p' \right] \text{ and} \\ \xi_2 &:= \left[ \max_{s,u} \left\{ \frac{1}{n} \sum_{i=1}^n B_s(Y_s^{(i)})^2, \frac{1}{n} \sum_{i=1}^n B_u(X_u^{(i)})^2 \right\} \leq \kappa_4 \right]. \end{aligned}$$

Then, by Proposition 1, the probabilities with which each event occurs are at least

$$\begin{aligned} P[\xi_1^c] &\leq c_1 n(p+q)p'^{-4} \leq c_1 p'^{-2}, \\ P[\xi_2^c] &\leq \exp(-\frac{\kappa_4^2}{4\kappa_h^2} n + \log(p+q)) \leq \exp(-c_2 n), \end{aligned}$$

as long as  $n \geq \frac{8\kappa_h^2}{\kappa_4^2} \log(p+q)$ .

Now, for a fixed  $t \in V \setminus s$ , we define  $V_t^{(i)}$  for notational convenience so that

$$W_t^n = \frac{1}{n} \sum_{i=1}^n B_s(Y_s^{(i)}) B_t(Y_t^{(i)}) - B_t(Y_t^{(i)}) D' \left( \theta_s^* + \sum_{u \in V'} \theta_{su}^* B_u(X_u) + \sum_{t \in V \setminus s} \theta_{st}^* B_t(Y_t) \right) = \frac{1}{n} \sum_{i=1}^n V_t^{(i)}.$$

Conditioned on the events  $\xi_1$  and  $\xi_2$ , by the definition of the moment generating function and standard Chernoff bound technique, we obtain

$$P \left[ \frac{1}{n} \sum_{i=1}^n |V_t^{(i)}| > \frac{\alpha}{2-\alpha} \frac{\lambda_n}{4} \mid \xi_1, \xi_2 \right] \leq 2 \exp \left( - \frac{\alpha^2}{(2-\alpha)^2} \frac{n \lambda_{y,n}^2}{32 \kappa_1(n, p) \kappa_4} \right),$$

as long as  $\frac{\alpha}{2-\alpha} \frac{\lambda_{y,n}}{4} \leq \kappa_1(n, p) \kappa_2(n, p) \kappa_4$  for large enough  $n$  (For details, see the proof of Lemma 2 in [10]). By a union bound over  $V \setminus s$ , we obtain

$$P \left[ \|W_y^n\|_\infty > \frac{\alpha}{2-\alpha} \frac{\lambda_n}{4} \mid \xi_1, \xi_2 \right] \leq 2 \exp \left( - \frac{\alpha^2}{(2-\alpha)^2} \frac{n \lambda_{y,n}^2}{32 \kappa_1(n, p) \kappa_4} + \log p \right).$$

Therefore, provided that  $\lambda_{y,n} \geq \frac{8(2-\alpha)}{\alpha} \sqrt{\kappa_1(n, p) \kappa_4} \sqrt{\frac{\log p}{n}}$ , we obtain

$$P \left[ \|W_y^n\|_\infty > \frac{\alpha}{2-\alpha} \frac{\lambda_{y,n}}{4} \mid \xi_1, \xi_2 \right] \leq \exp(-c'_3 n).$$

By a very similar process for a set  $V'$ , we have

$$P \left[ \|W_x^n\|_\infty > \frac{\alpha}{2-\alpha} \frac{\lambda_{x,n}}{4} \mid \xi_1, \xi_2 \right] \leq \exp(-c'_3 n),$$

for a  $\lambda_{x,n} \geq \frac{8(2-\alpha)}{\alpha} \sqrt{\kappa_1(n, p) \kappa_4} \sqrt{\frac{\log q}{n}}$ . Finally, we have the resulting statement in the lemma by utilizing the fact that  $P(A_1 \text{ or } A_2) \leq P(\xi_1^c) + P(\xi_2^c) + P(A_1 \mid \xi_1, \xi_2) + P(A_2 \mid \xi_1, \xi_2)$ .

#### B.4 Proof of Lemma 2

In order to establish the error bound  $\|\hat{\theta}_S - \theta_S^*\|_2 + \|\hat{\theta}_T - \theta_T^*\|_2 \leq B$  for some radius  $B$ , we can extend the results in the several previous works (e.g. [26, 13]) and prove that it suffices to show  $F(u_T, u_S) > 0$  for all  $u_T := \theta_T - \theta_T^*$  and  $u_S := \theta_S - \theta_S^*$  s.t.  $\|u_T\|_2 + \|u_S\|_2 = B$  where

$$F(u_T, u_S) := \ell(\theta_T^* + u_T, \theta_S^* + u_S; \mathcal{Z}) - \ell(\theta_T^*, \theta_S^*; \mathcal{Z}) + \lambda_{x,n}(\|\theta_T^* + u_T\|_1 - \|\theta_T^*\|_1) + \lambda_{y,n}(\|\theta_S^* + u_S\|_1 - \|\theta_S^*\|_1).$$

Note again that  $T$  is the true support set of  $\theta^x$  and  $S$  is that of  $\theta^y$ . Note also that for  $\hat{u}_T := \hat{\theta}_T - \theta_T^*$  and  $\hat{u}_S := \hat{\theta}_S - \theta_S^*$ ,  $F(\hat{u}_T, \hat{u}_S) \leq 0$  and  $F(0, 0) = 0$ . Below we show that  $F(u_T, u_S)$  is strictly positive on the boundary of the ball with radius  $B = M \max \{ \sqrt{d_x} \lambda_{x,n}, \sqrt{d_y} \lambda_{y,n} \}$  where  $M > 0$  is a parameter that we will choose later in this proof.

Some algebra yields

$$F(u_T, u_S) \geq \left( \max \{ \sqrt{d_x} \lambda_{x,n}, \sqrt{d_y} \lambda_{y,n} \} \right)^2 \left\{ -\frac{1}{4} M + q^* M^2 - 2M \right\} \quad (26)$$

where  $q^*$  is the minimum eigenvalue of  $\nabla^2 \ell(\theta_T^* + v u_T, \theta_S^* + v u_S; \mathcal{Z})$  for some  $v \in [0, 1]$ . Moreover, by the similar reasoning as in the case of Lemma 3 of [10], we can find the lower bound of  $q^*$ :

$$q^* \geq \rho_{\min} - 4 \rho_{\max} M \sqrt{d_x + d_y} \max \{ \sqrt{d_x} \lambda_{x,n}, \sqrt{d_y} \lambda_{y,n} \} \kappa_3(n, p) \log p',$$

conditioned on  $\xi_1$ . From (26), we obtain

$$F(u_T, u_S) \geq (\lambda_n \sqrt{d})^2 \left\{ -\frac{1}{4} M + \frac{\rho_{\min}}{2} M^2 - 2M \right\},$$

as long as  $\sqrt{d_x + d_y} \max \{ \sqrt{d_x} \lambda_{x,n}, \sqrt{d_y} \lambda_{y,n} \} \leq \frac{\rho_{\min}}{8 \rho_{\max} M \kappa_3(n, p) \log p'}$ .

Finally, we set  $M = \frac{9}{\rho_{\min}}$  so that  $F(u_T, u_S)$  is strictly positive, and hence we can conclude that

$$\|\hat{\theta}_S - \theta_S^*\|_2 + \|\hat{\theta}_T - \theta_T^*\|_2 \leq \frac{9}{\rho_{\min}} \max \{ \sqrt{d_x} \lambda_{x,n}, \sqrt{d_y} \lambda_{y,n} \},$$

provided that  $\sqrt{d_x + d_y} \max \{ \sqrt{d_x} \lambda_{x,n}, \sqrt{d_y} \lambda_{y,n} \} \leq \frac{\rho_{\min}^2}{72 \rho_{\max} \kappa_3(n, p) \log p'}$ .

### B.5 Proof of Lemma 3

Again from the similar reasoning as in the proof of Lemma 4 of [10], we have

$$|R_t^n| \leq 4\kappa_3(n, p)\rho_{\max} \log p' \|\widehat{\boldsymbol{\theta}}_{T;S} - \boldsymbol{\theta}_{T;S}^*\|_2^2 \leq 4\kappa_3(n, p)\rho_{\max} \log p' (\|\widehat{\boldsymbol{\theta}}_S - \boldsymbol{\theta}_S^*\|_2 + \|\widehat{\boldsymbol{\theta}}_T - \boldsymbol{\theta}_T^*\|_2)^2$$

for all  $t \in V \setminus s\{1, \dots, p-1\} \cup V'$ . Therefore, if Lemma 2 holds, then

$$\|R^n\|_\infty \leq \frac{324\rho_{\max}\kappa_3(n, p) \log p'}{\rho_{\min}^2} \max\{d_x \lambda_{x,n}^2, d_y \lambda_{y,n}^2\}$$

which is equivalent with

$$\frac{\|R^n\|_\infty}{\min\{\lambda_{x,n}, \lambda_{y,n}\}} \leq \frac{324\rho_{\max}\kappa_3(n, p) \log p'}{\rho_{\min}^2} \frac{\max\{d_x \lambda_{x,n}^2, d_y \lambda_{y,n}^2\}}{\min\{\lambda_{x,n}, \lambda_{y,n}\}} \leq \frac{\alpha}{4(2-\alpha)}$$

by the assumption of the lemma.
